# Supplementary material
Source: HighWire-hosted journal article supplement (https://bmjopenquality.bmj.com/highwire/filestream/135994/field_highwire_adjunct_files/0/ds2665.docx)
Supplement: ds2665.docx [file ds2665.docx]

**Schematic 1**: Bookmark of the GICU Daily Review Checklist

**GICU DAILY REVIEW CHECKLIST**

**HAVE YOU CHECKED …**

**Drug Chart**

**VTE Form:**

- Rx/TEDs/Flotrons

**Antibiotics:**

- Start/Stop/Indication

**Ventilation Care Bundle:**

- Simple eye ointment

- Chlorhex mouthwash

**OVER 24 HRS …**

**Glucose**

- CBGs over 24 hrs

**Bowel working**

- Prokinetics

**Delerium Score**

- CAM Score

**Dementia Score**

- > 75 yrs old

**HAVE YOU MADE A …**

**Sedation Plan**

- Indication

- Future plan

**Fluid Balance plan**

- Ins/Outs

- Target balance

**Lines & Tubes plan**

- Indication

- Working

**IF FOUND, PLEASE RETURN TO GICU**
